# Supplementary material for: The formation and effect of O-vacancies in doped TiO2
Source: Royal Society of Chemistry journal article supplement (doi:10.1039/d0nj01017k), 2020-01-01
Supplement: d0nj01017k1.pdf [file d0nj01017k1.pdf]

## The formation and effect of O-vacancies in doped TiO<sub>2</sub>

New Journal of Chemistry

Kaustava Bhattacharyya<sup>a,d\*</sup>, B. Modak<sup>c</sup>, C. Nayak<sup>b</sup>, R. G. Nair<sup>a</sup>, D. Bhattacharyya<sup>b,d</sup>, S. N. Jha,  
and A. K. Tripathi<sup>a,d</sup>

a- Chemistry Division, Bhabha Atomic Research Centre, Mumbai-40085, India

b- Atomic & Molecular Physics Division, Bhabha Atomic Research Centre, Mumbai – 400  
085, India

c- Theoretical Chemistry Section, Bhabha Atomic Research Centre, Mumbai-40085, India

d- Homi Bhabha National Institute, Anushaktinagar, Mumbai-400094

### Supplementary Information

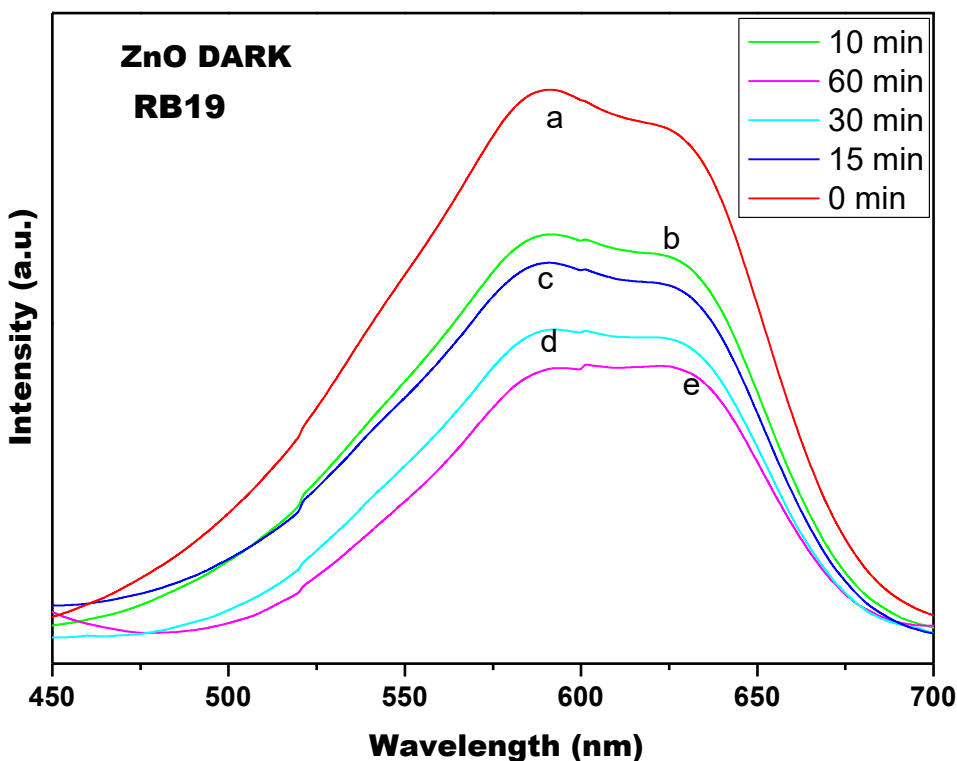

Fig. S.1:- Adsorption profile of RB-19 on nano- ZnO where the adsorption is carried out for a) 0 min, b) 10 min; c) 15 min; d) 30 min; e) 60 min.

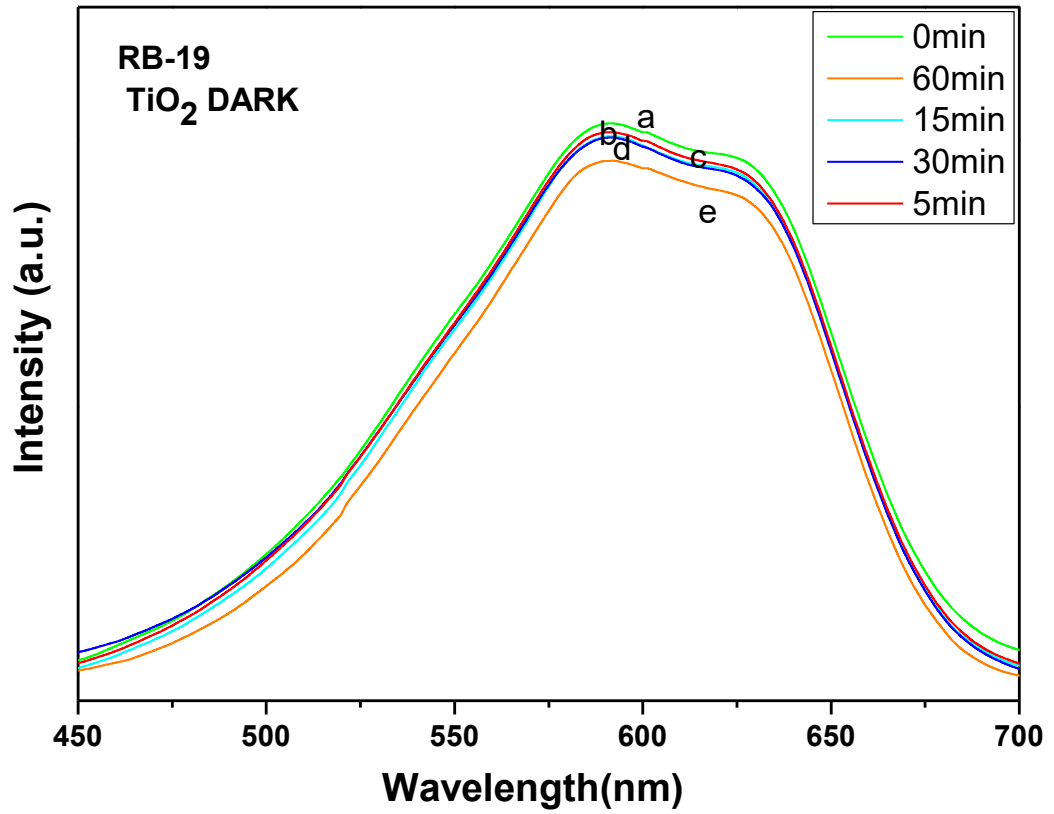

Fig. S.2:- Adsorption profile of RB-19 on nano- TiO<sub>2</sub> where the adsorption is carried out for a) 0 min, b) 10 min; c) 15 min; d) 30 min; e) 60 min.

| Sample           | Crystallite Size (nm) <sup>a</sup> | Surface Area (m <sup>2</sup> /g) <sup>b</sup> | a=b (Å) | c(Å)  | Vol (Å <sup>3</sup> ) | Composition from ICP-MS |
|------------------|------------------------------------|-----------------------------------------------|---------|-------|-----------------------|-------------------------|
| TiO <sub>2</sub> | 20                                 | 54.49                                         | 3.785   | 9.513 | 136.28                | -                       |
| Zn-1             | 20                                 | 46.74                                         | 3.785   | 9.458 | 135.51                | Ti=34.52, Zn=0.91       |
| Zn-2             | 15                                 | 59.85                                         | 3.785   | 9.417 | 134.90                | Ti=35.12, Zn=1.62       |
| Zn-5             | 12                                 | 70.1                                          | 3.785   | 9.429 | 135.01                | Ti=34.29, Zn=3.62       |
| Zn-10            | 12                                 | 68.6                                          | 3.785   | 9.403 | 134.71                | Ti=32.92, Zn=6.83       |

Table-S.I -1 : The table shows the crystallite size and the surface area of the different Zn-doped TiO<sub>2</sub> and nano TiO<sub>2</sub> particles. It shows the lattice cell parameters of a, b, c and the total volume of the Anatase lattice with different doping of Zn. The lattice parameters and the cell volume are calculated by the POWDEREX software

a: Crystallite size obtained from Scherer Equation from the XRD data (Fig. S.1) using the  $\theta = 25.4^\circ$ ;

b: Pore volume obtained from the BJH distribution plot of the desorption branch at  $p/p_0 \sim 0.995$
